# Supplementary material for: Role of TGF‐β1/miR‐382‐5p/SOD2 axis in the induction of oxidative stress in CD34+ cells from primary myelofibrosis
Source: PubMed Central journal article supplement (PMC6275274; doi:10.1002/1878-0261.12387), 2018-11-16
Supplement: MOL2-12-2102-s001.pdf [file MOL2-12-2102-s001.pdf]

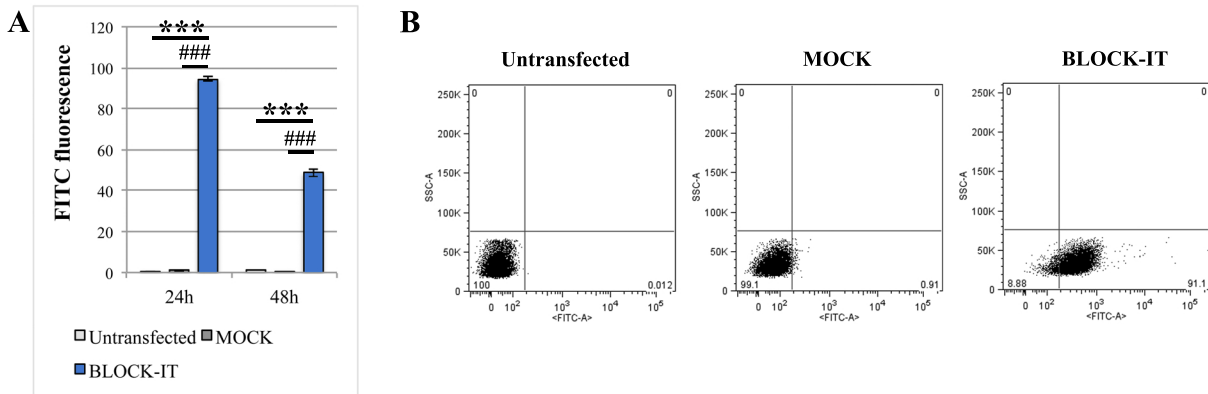

**Figure S1**

**Figure S1: miRNA transfection efficiency.** (A) BLOCK-IT Fluorescent Oligo was used to estimate the miRNA transfection efficiency in CD34<sup>+</sup> cells. CD34<sup>+</sup> cells underwent two nucleofection every 24 hours with 0.214 nmoles BLOCK-IT fluorescent oligo using the same protocol as for miRNA transfection. FITC fluorescence was detected by flow cytometry at 24 and 48 hours after the last nucleofection. (B) Representative flow cytometry dot plot showing FITC fluorescence in BLOCK-IT transfected cells compared to untransfected and MOCK-transfected samples at 24 hours after the last nucleofection. 2-tailed Student t test: \*\*\*,  $P < 0.001$  versus Untransfected Sample; ###,  $P < 0.001$  versus MOCK-transfected cells.

Abbreviations: h, hours; FITC, Fluorescein isothiocyanate; SSC, Side scatter
