# Supplementary material for: Role of TGF‐β1/miR‐382‐5p/SOD2 axis in the induction of oxidative stress in CD34+ cells from primary myelofibrosis
Source: PubMed Central journal article supplement (PMC6275274; doi:10.1002/1878-0261.12387), 2018-11-16
Supplement: MOL2-12-2102-s002.pdf [file MOL2-12-2102-s002.pdf]

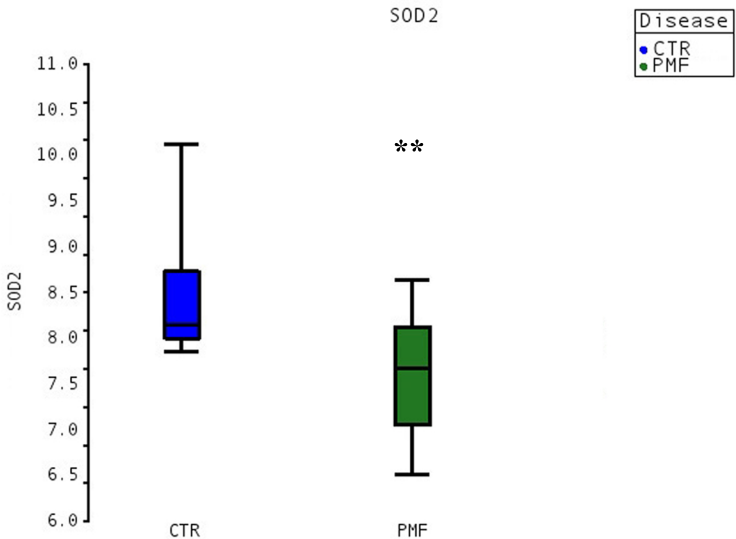

**Figure S2**

**Figure S2: SOD2 expression in CD34+ cells from PMF patients and healthy donors.**

SOD2 expression level was assessed by microarray analysis in 42 PMF patients and 16 healthy donors by means of Affymetrix platform as previously described (Norfo et al., 2014).

Mann–Whitney U test: \*\*,  $P < .01$  versus CTR, 2-tailed student t-test.

Abbreviations: SOD2, superoxide dismutase 2; CTR, healthy donors; PMF, primary myelofibrosis.
